# Supplementary material for: Marine Organic Aerosols at Mace Head: Effects from Phytoplankton and Source Region Variability
Source: Copernicus journal article supplement (doi:10.5194/egusphere-2024-2890), 2024-09-24
Supplement: Supplementary file 1 [file egusphere-2024-2890-supplement.pdf]

# **Supplementary information of Marine Organic Aerosols at Mace Head: Effects from Phytoplankton and Source Region Variability**

Emmanuel Chevassus<sup>1</sup>, Kirsten N. Fossum<sup>1</sup>, Darius Ceburnis<sup>1</sup>, Lu Lei<sup>1</sup>, Chunshui Lin<sup>2</sup>, Wei Xu<sup>1a</sup>, Colin D. O' Dowd<sup>1</sup>, Jurgita Ovadnevaite<sup>1</sup>

<sup>1</sup> School of Natural Sciences, Ryan Institute's Centre for Climate and Air Pollution Studies, University of Galway, Galway, Ireland

<sup>a</sup> Now at: Institute of Urban Environment, Chinese Academy of Sciences, Xiamen 361021

<sup>2</sup> State Key Laboratory of Loess and Quaternary Geology (SKLLQG), Centre for Excellence in Quaternary Science and Global Change, Institute of Earth Environment, Chinese Academy of Sciences, Xi'an 710061, China

*Correspondence to:* Jurgita Ovadnevaite (jurgita.ovadnevaite@universityofgalway.ie)

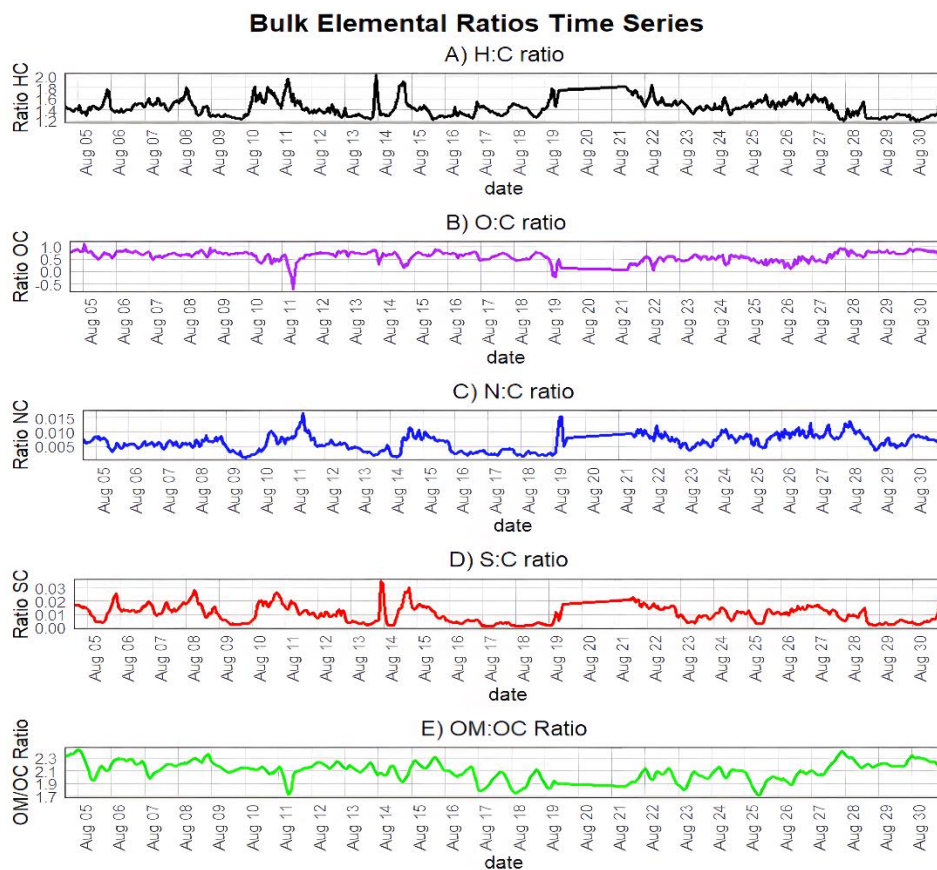

**Figure S1. Elemental bulk ratios (H:C, O:C, N:C, S:C, and OM:OC) time series. The five panels show the hourly variations of A) Hydrogen-to-carbon (H:C) B) Oxygen-to-carbon (O:C) C) Nitrogen-to-carbon (N:C), D) Sulphur-to-carbon (S:C), and E) Organic matter-to-organic carbon (OM/OC) ratios, respectively.**

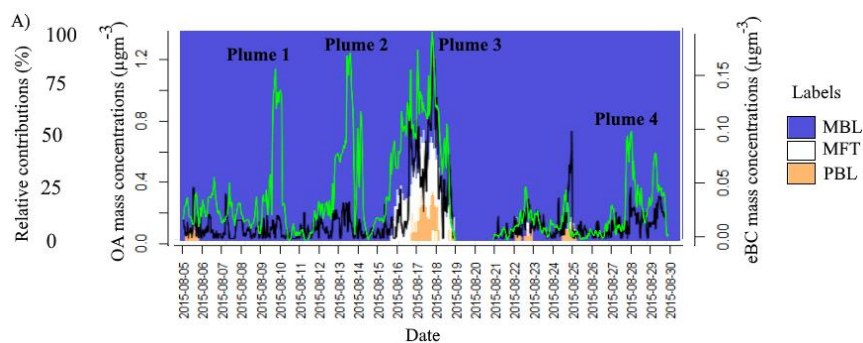

**Figure S2. OA (green) and eBC (black) time series plotted alongside the fractional contribution of marine free troposphere (MFT), marine boundary layer (MBL) and planetary boundary layer (PBL). Many OA plumes happen in the MBL while a mixed episode ‘Plume 3’ had some PBL and MFT influence. Most of these OA plumes cover various regions of the West European Basin while ‘Plume 4’ specifically originate from Polar Air Masses.**

#### **Text S1. Positive Matrix Factorization (PMF) Model.**

Organic mass spectra were processed with Positive Matrix Factorization (PMF) via the Toolkit Source Finder

(SoFi) code in Igor Wavemetrics. Due to the low  $m/z$  values for large ions, only ions with  $m/z$  less than 130.07 were considered in this study. We performed the unconstrained PMF runs to examine a range of solutions with 1 to 11 factors. Reasonable results were obtained for factor numbers  $N=4$  based on the resolved profiles (Figure S13). For  $N=4$ , MO-OOA was resolved according to oxidation state,  $O_3$ , O:C ratio, time series, mass spectral properties compared with previous studies. MSA-OA was resolved according to reconstructed MSA,  $SO_4$  and mass spectral properties. PMOA was resolved according to reference mass spectra. Finally, Peat-OA was resolved according to eBC and mass spectral properties.

Compared to the  $N=4$  solution, in the  $N=5$  solution ( $Q/Q_{exp}$  ratio=1.38), MO-OOA was further splatted into 2 factors (Figure S3) which appeared less meaningful compared to  $N=4$  for which factors were more clearly identified. Furthermore, the Peat-OA factor was split into two factors, with the second factor being insignificant bearing no additional physical interpretation. Therefore, we reasoned that the  $N=4$  solution was the most reasonable.

To further refine the solution and mitigate the rotational uncertainty, fpeak analysis was performed on the four-factor solution. The  $Q/Q_{exp}$  ratio remained stable without any notable increases or decreases across an fpeak range of -1 to 1, as depicted in Figure S2. This suggests that the solution remains consistent across different fpeak values. Consequently, the solution with fpeak=0 was considered optimal. Additionally, the errors were found to be acceptable, with the maximum error below 5% and other errors also falling within acceptable ranges (Figure S1)

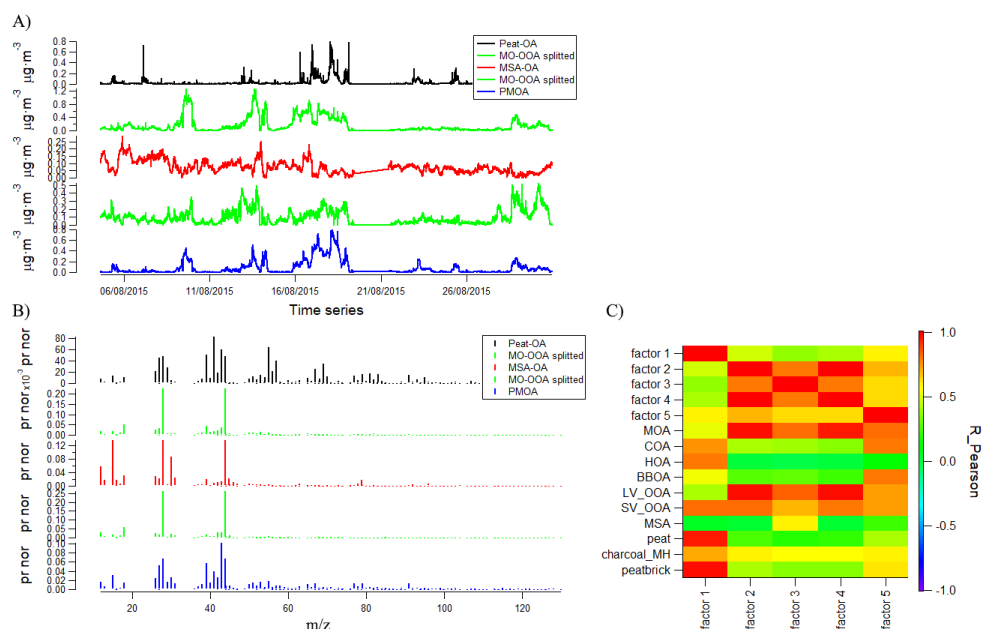

**Figure S3: PMF metrics – 5 factors solution A) Times Series B) PMF Mass spectra C) Correlations with reference mass spectra.**

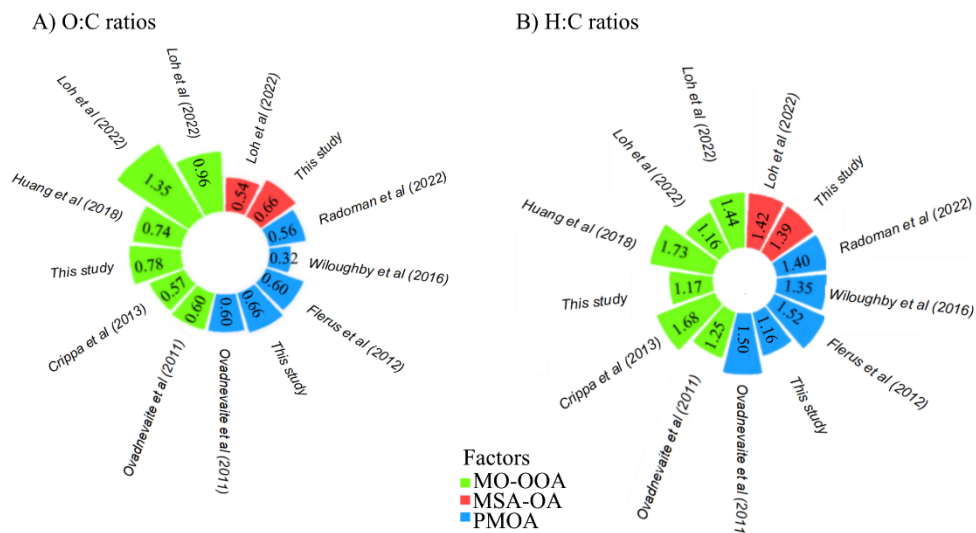

**Figure S4. Circular bar plot, comparison between literature O:C and H:C ratios values for MO-OOA (green), MSA-OA (red) and PMOA (blue).**

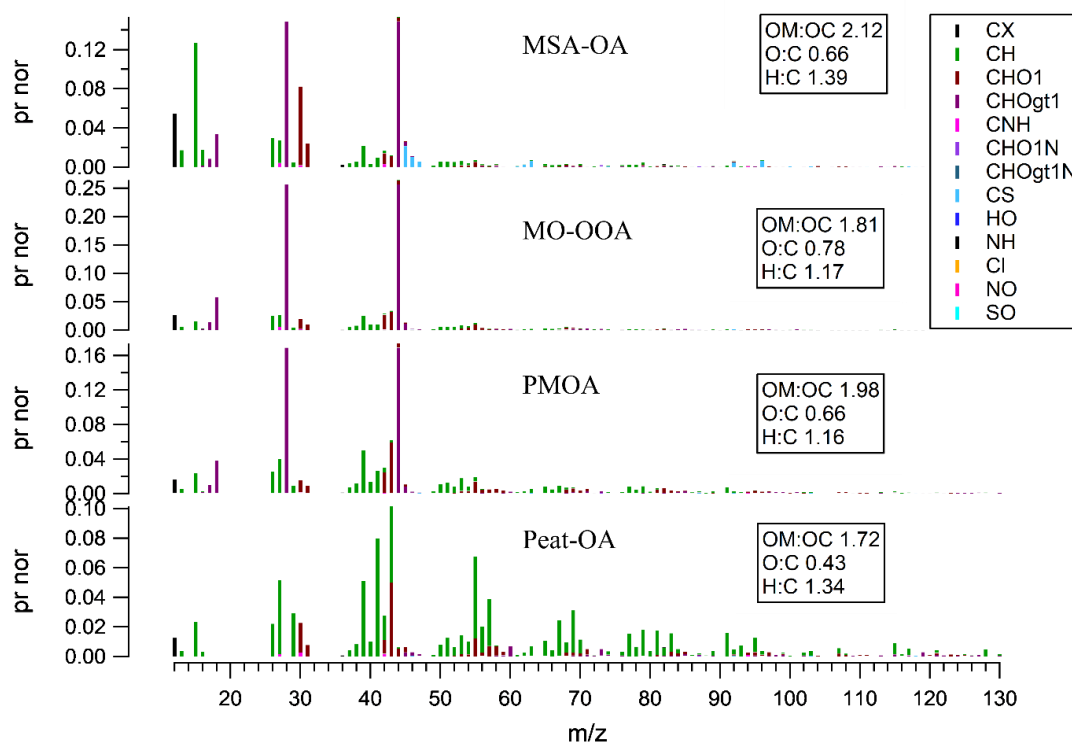

**Figure S5. PMF factors HR families (Canagaratna -ambient method).**

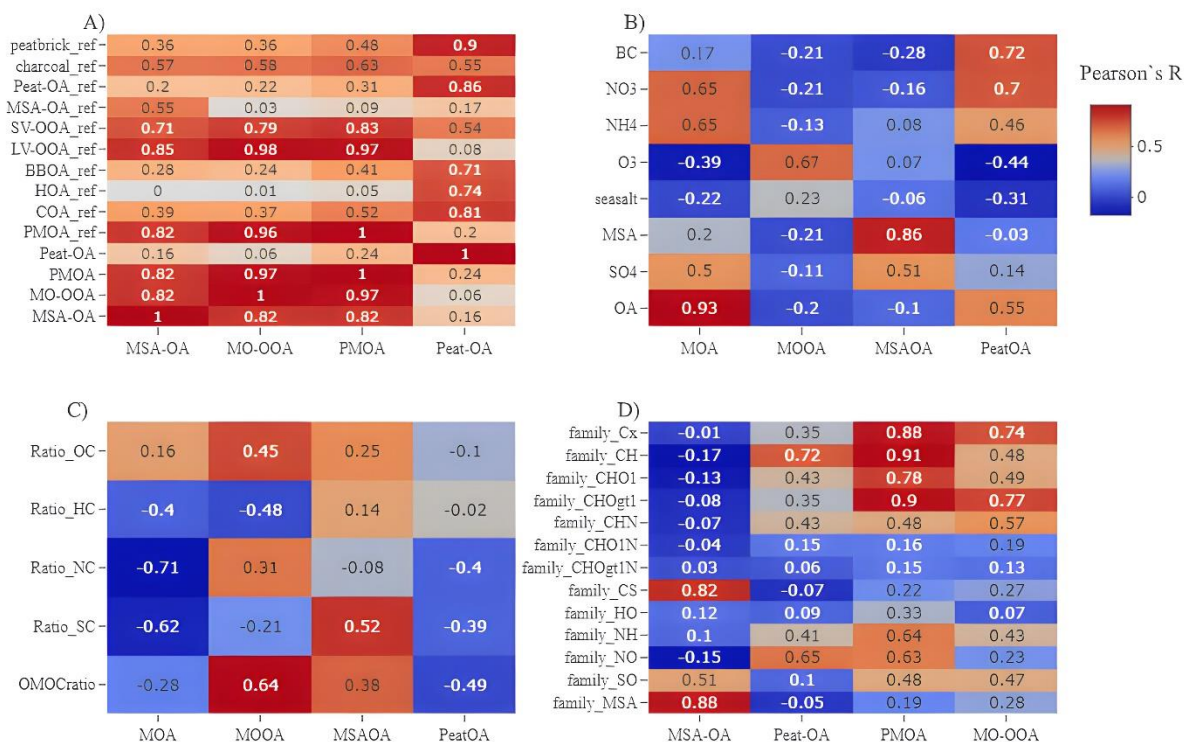

**Figure S6.** Pearson's correlation heatmaps of A) correlation between PMF mass spectra and reference mass spectra, B) correlation between PMF time series and external tracers time series, C) correlations between PMF time series and bulk elemental ratios time series, D) shows correlations between PMF times series and bulk OA families.

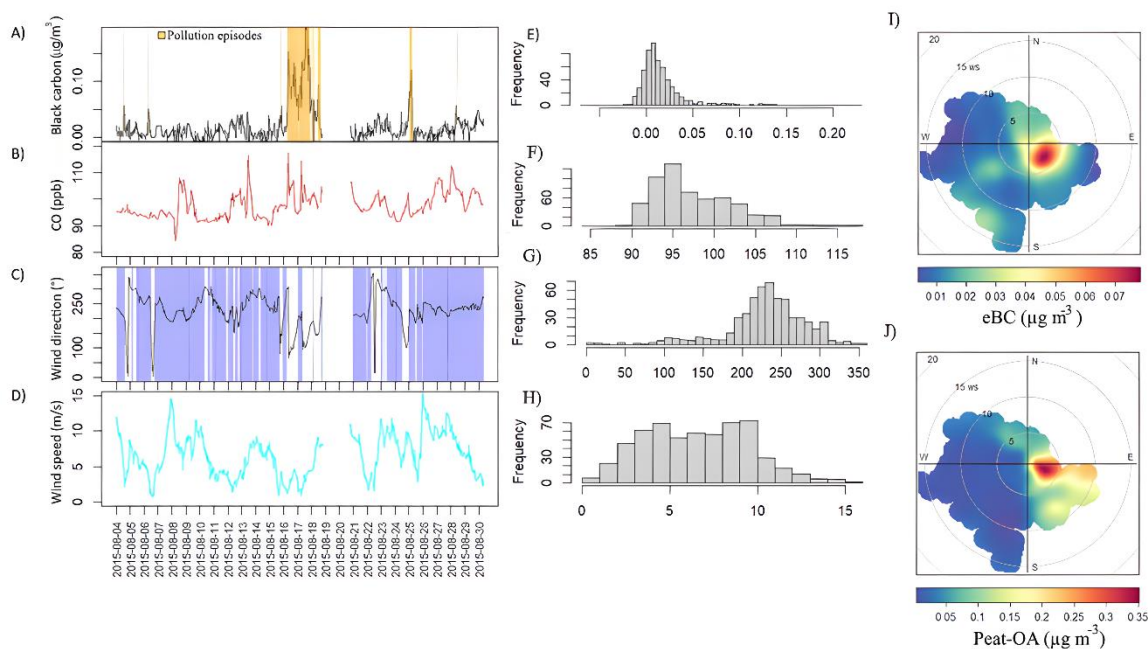

**Figure S7.** eBC mass concentrations time series, orange shaded areas represent eBC mass

concentrations  $>50\mu\text{g m}^{-3}$  B) CO mixing ratio (ppb) C) Wind Direction, blue shaded areas represent marine sector (190-300°) D) Wind speed (m/s) I) eBC pollution wind rose J) Peat-OA pollution wind rose. Histograms associated to each time series are represented in the middle panel.

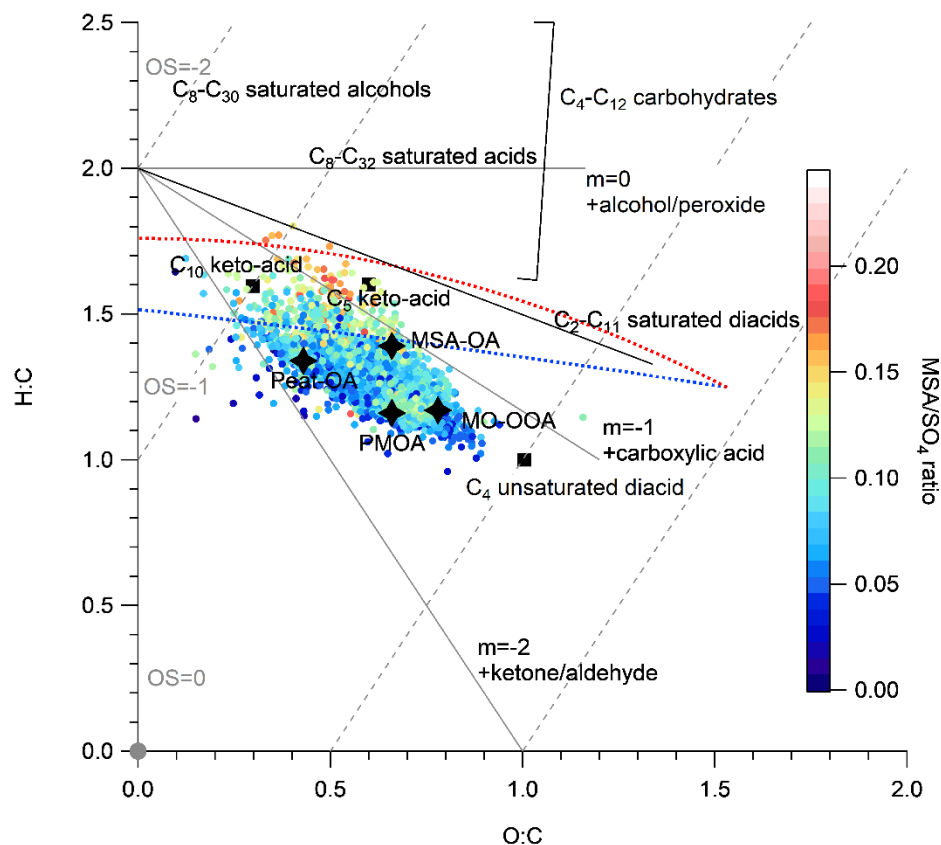

**Figure S8.** Relationship between the ToF-AMS estimated oxygen-to-carbon (O/C) and hydrogen-to-carbon (H/C) ratios of organic species [Canagaratna *et al.*, 2015] colored by the MSA-to-sulfate ratio, all observations above ToF-AMS detection limits are shown for the entire period. Grey lines represent the ambient range of O/C and H/C observed by Ng *et al.* [2011] while dashed line represent the average carbon oxidation state ( $OSc \approx 2 \times O : C - H : C$ ) (2011) superimposed on the Van Krevelen diagram (Ng *et al.* 2011, Kroll *et al.*, 2011). Elemental composition of C8–C30 saturated alcohols, C8–C32 saturated acids, C2 –C11 saturated diacids, C4 unsaturated diacid (maleic and fumaric acid), C4 –C12 carbohydrates (e.g., trehalose, erythritol, arabitol, mannitol, sucrose, galactose, glucose, and fructose), and C5 and C10 ketoacids (levulinic and pinonic acid, respectively) are shown for reference (Willis *et al.* 2017).

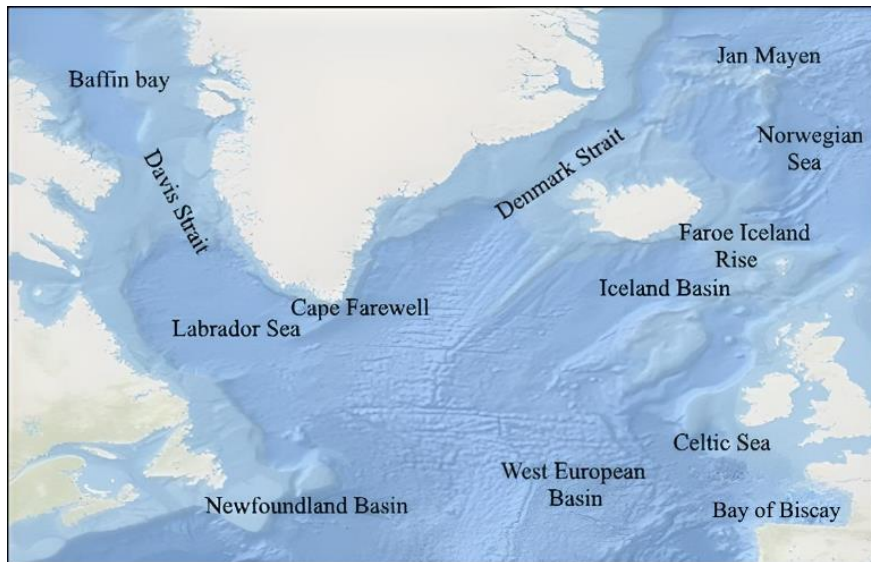

**Figure S9. Descriptive toponymy of Ocean areas of interest and landmarks. Background Map from © OpenStreetMap contributors.**

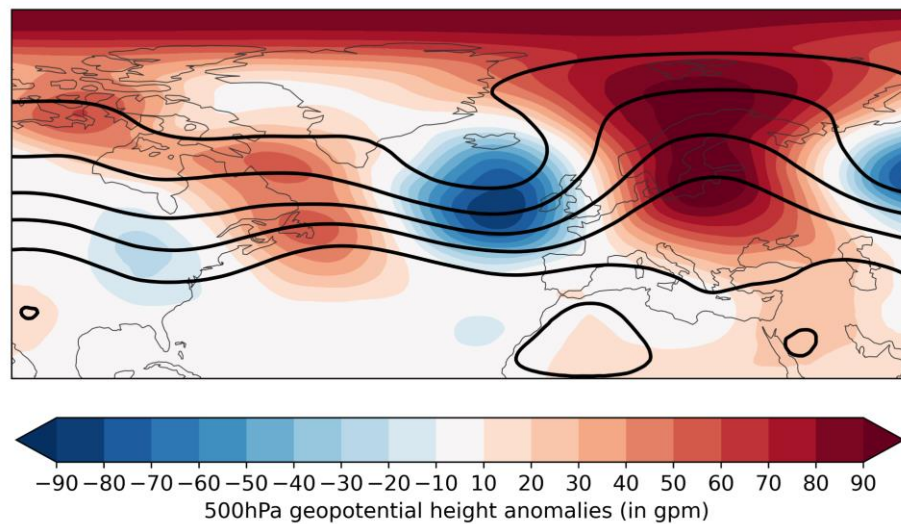

**Figure S10 -500hPa geopotential height anomalies (in gpm) highlighting anticyclonic blocking (in red) calculated from ERA5 (Hersbach *et al.* 2020).**

### References

- Hersbach, Hans, Bill Bell, Paul Berrisford, Shoji Hirahara, András Horányi, Joaquín Muñoz-Sabater, Julien Nicolas, et al. 2020. 'The ERA5 Global Reanalysis'. *Quarterly Journal of the Royal Meteorological Society* 146 (730): 1999–2049. <https://doi.org/10.1002/qj.3803>.
- Willis, Megan D., Franziska Köllner, Julia Burkart, Heiko Bozem, Jennie L. Thomas, Johannes Schneider, Amir A. Aliabadi, et al. 2017. 'Evidence for Marine Biogenic Influence on Summertime Arctic Aerosol'. *Geophysical Research Letters* 44 (12): 6460–70. <https://doi.org/10.1002/2017GL073359>.
